# Supplementary material
Source: PubMed Central journal article supplement (PMC4005972)
Supplement: mmc3.pdf [file mmc3.pdf]

Figure S3

Burkitt lymphoma

p-Ser motifs

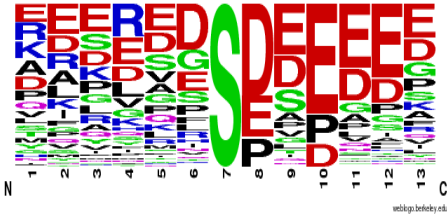

p-Thr motifs

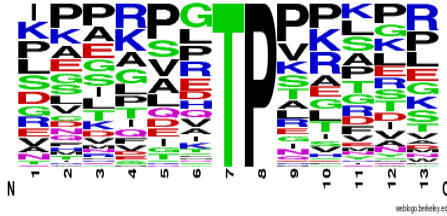

p-Tyr motifs

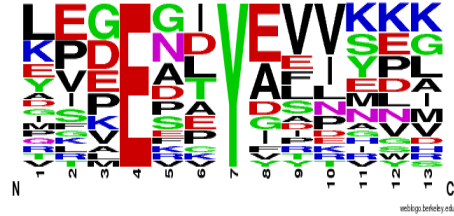

Follicular lymphoma

p-Ser motifs

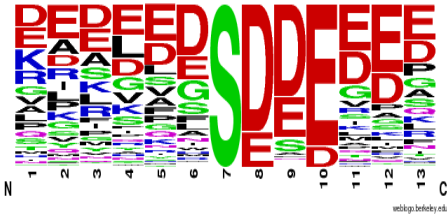

p-Thr motifs

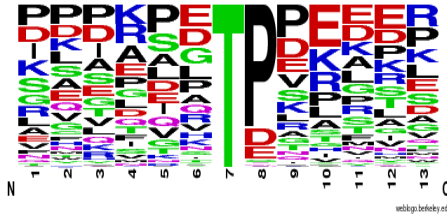

p-Tyr motifs

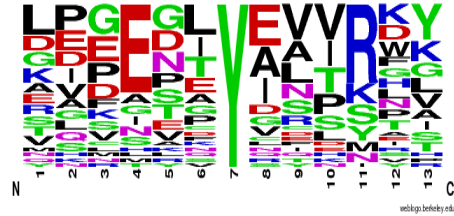

Mantle cell lymphoma

p-Ser motifs

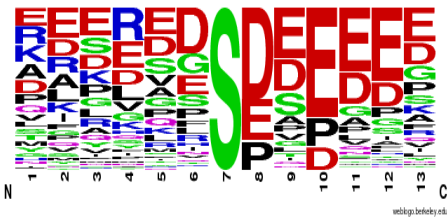

p-Thr motifs

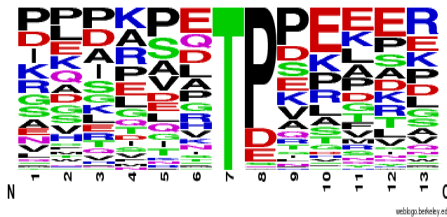

p-Tyr motifs

No recurrent motif found
