# Supplementary material
Source: PubMed Central journal article supplement (PMC4005972)

# Figure S1

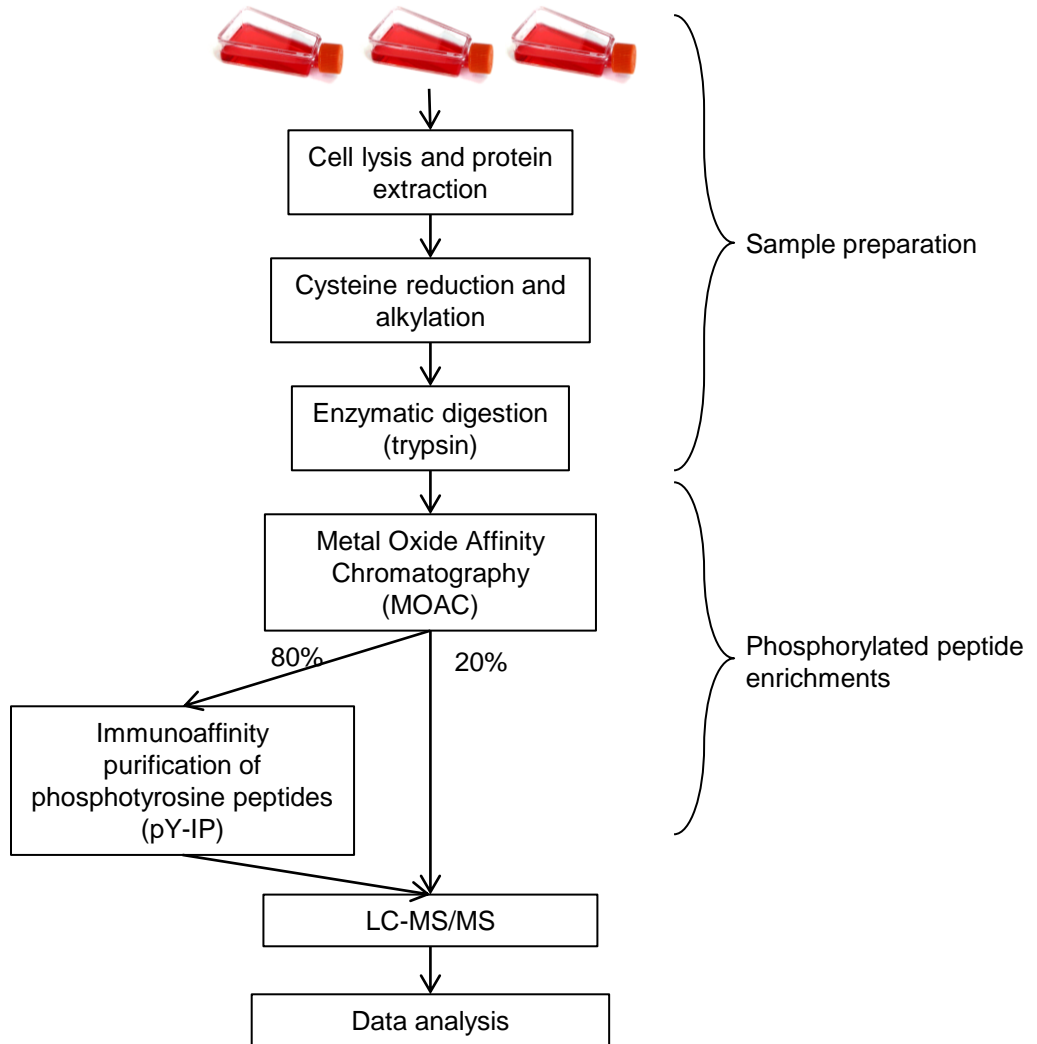

Supplement: mmc1.pdf [file mmc1.pdf]

# Figure S2

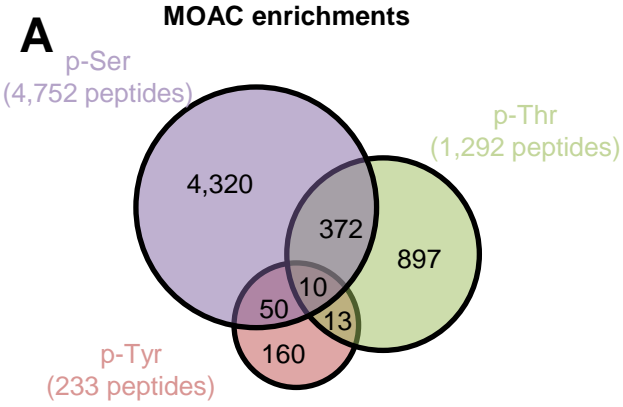

**MOAC followed by pY-IP enrichments**

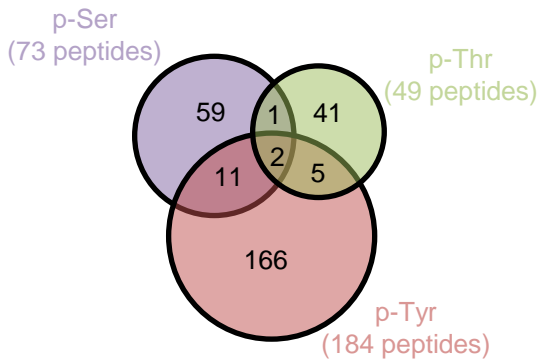

**B**

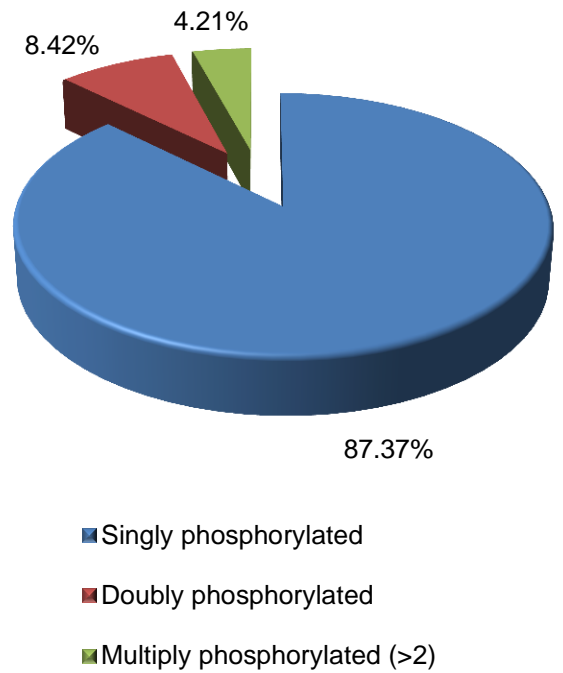

**C**

**All B-NHLs**

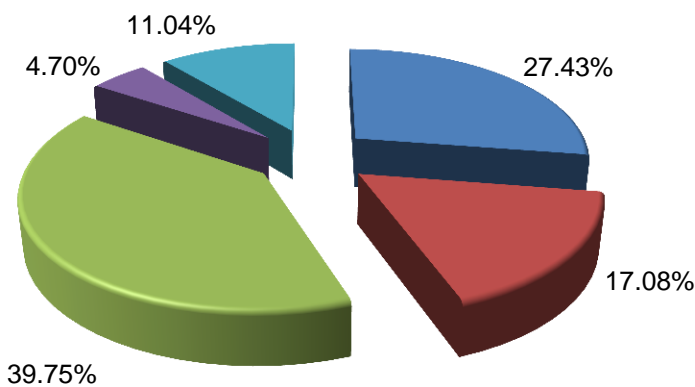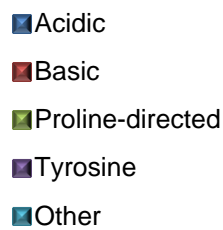

**BL**

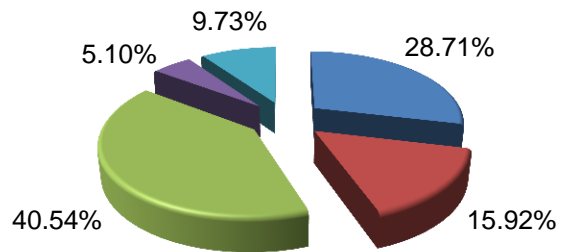

**FL**

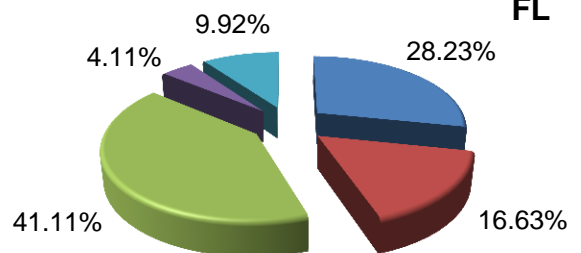

**MCL**

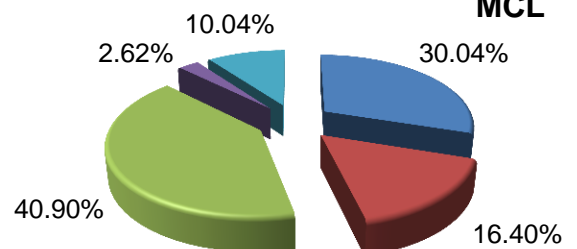

Supplement: mmc2.pdf [file mmc2.pdf]

# Figure S4

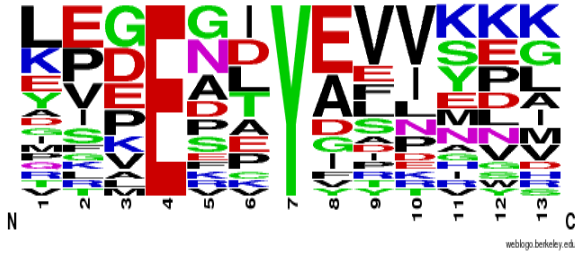

| NHL entity | Fold increase |
|------------|---------------|
| BL         | 3.18          |
| FL         | 3.85          |
| MCL        | 0             |

Supplement: mmc4.pdf [file mmc4.pdf]

# Figure S5

**A**

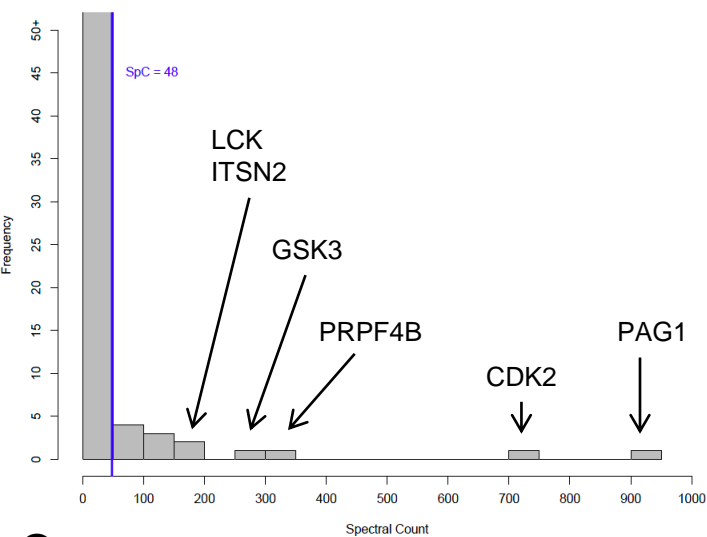

**B**

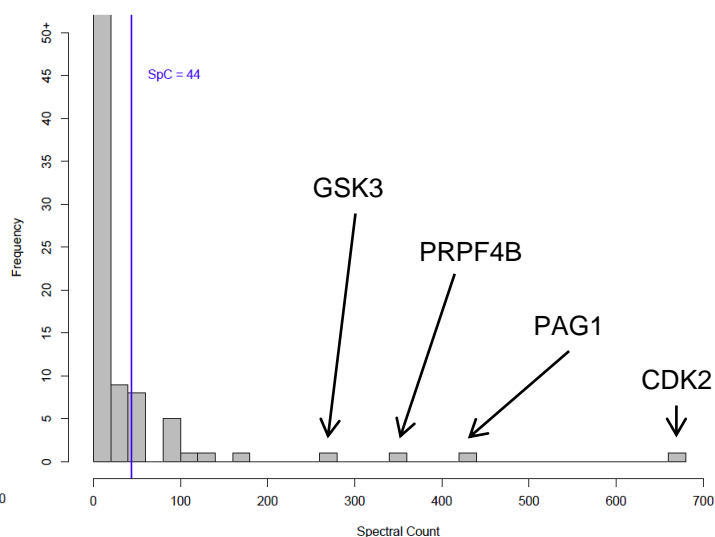

**C**

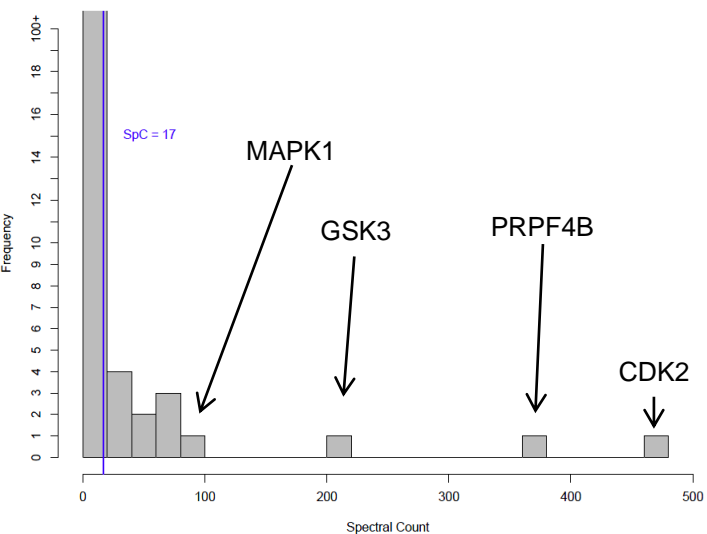

**D**

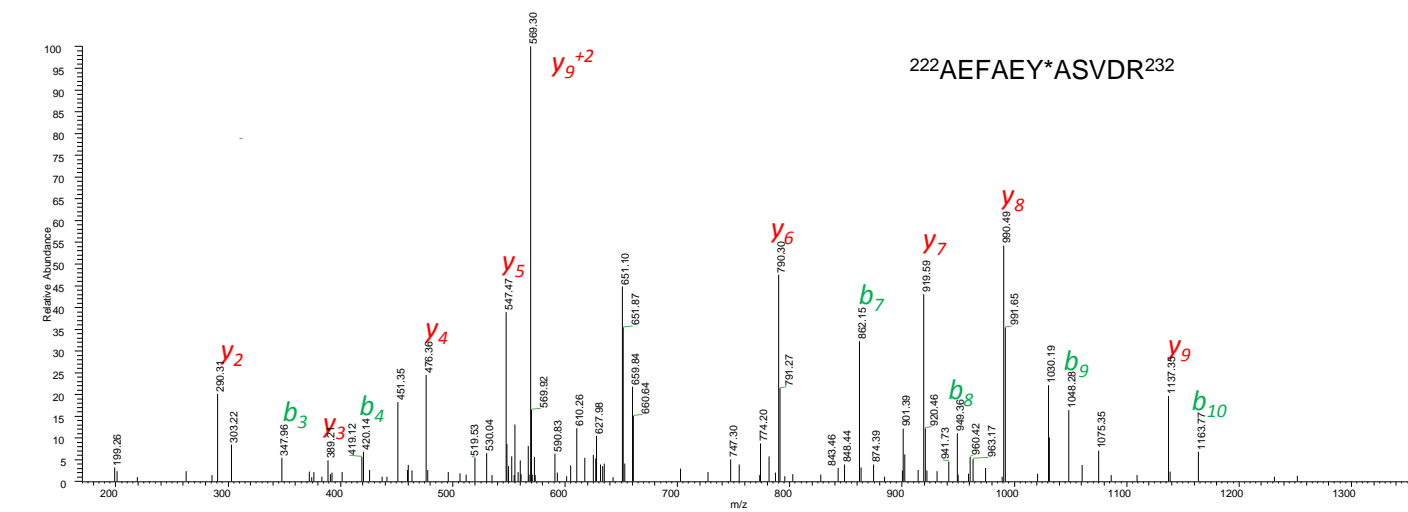

Supplement: mmc5.pdf [file mmc5.pdf]

# Figure S6

**A**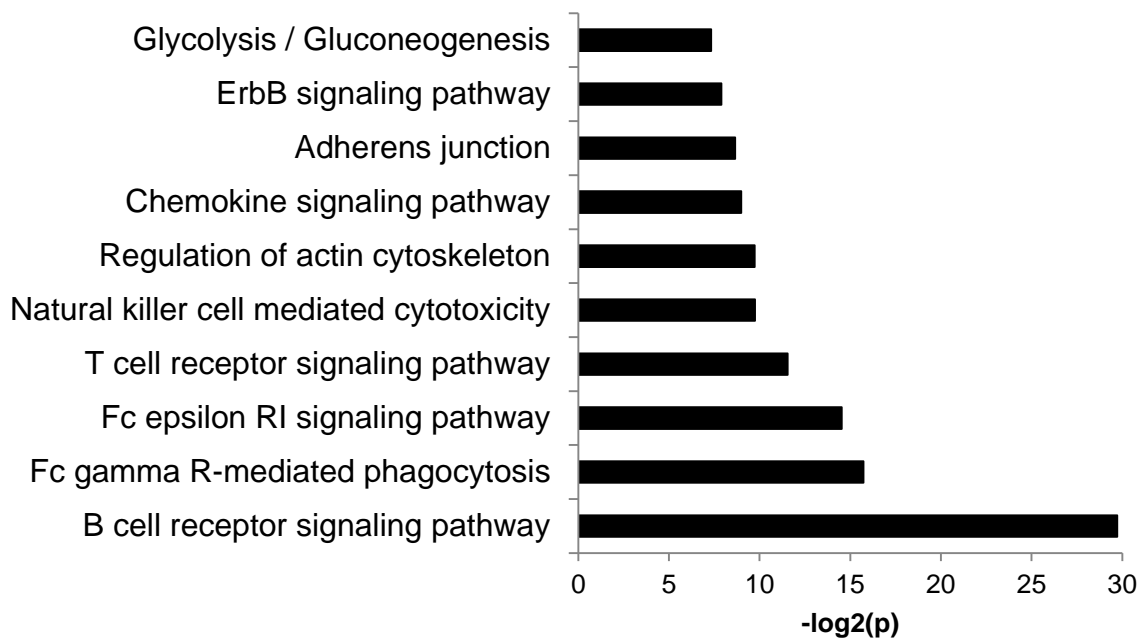**B**

Cell cycle / mitosis

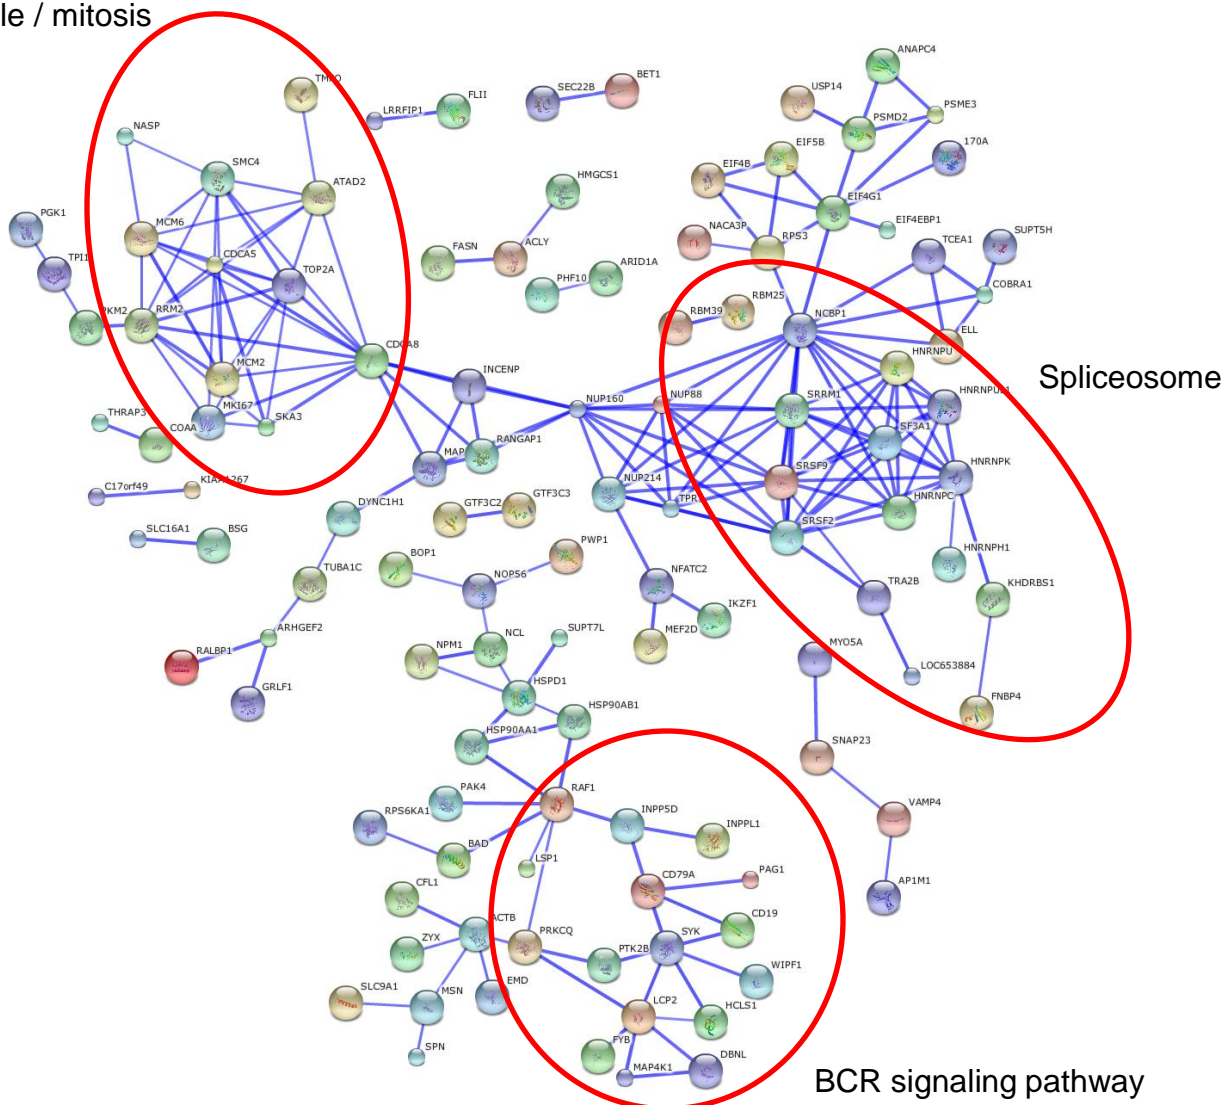

Supplement: mmc6.pdf [file mmc6.pdf]
